# Supplementary material for: Troponin and BNP are markers for subsequent non-ischaemic congestive heart failure: the Caerphilly Prospective Study (CaPS)
Source: PubMed Central journal article supplement (PMC5845403; doi:10.1136/openhrt-2017-000692), 2018-02-23
Supplement: openhrt-2017-000692supp001.pdf [file openhrt-2017-000692supp001.pdf]

## Supplementary tables

**Supplementary Table 1 Sample sizes used in this report**

|                                                  |      |
|--------------------------------------------------|------|
| Total number of men examined                     | 2171 |
| Fasting for blood sample                         | 1911 |
| No previous CVD                                  | 1279 |
| Fasting & No previous CVD                        | 1176 |
| Fasting, No previous CVD and complete covariates | 1112 |

**Supplementary Table 2 Comparing the predictive power of survival models using the increment in Harrell's C statistic resulting from the addition of biomarkers to the model**

| End Point | Biomarkers in model   | Before adding |        |       | After adding |        |       | P    |
|-----------|-----------------------|---------------|--------|-------|--------------|--------|-------|------|
|           |                       | C statistic   | 95% CI |       | C statistic  | 95% CI |       |      |
| MI/IHD    | Troponin added to BNP | 0.678         | 0.637  | 0.720 | 0.688        | 0.626  | 0.708 | 0.15 |
| MI/IHD    | BNP added to Troponin | 0.685         | 0.644  | 0.727 | 0.686        | 0.644  | 0.728 | 0.45 |
| CHF       | Troponin added to BNP | 0.767         | 0.694  | 0.839 | 0.777        | 0.706  | 0.849 | 0.54 |
| CHF       | BNP added to Troponin | 0.745         | 0.670  | 0.820 | 0.775        | 0.704  | 0.846 | 0.16 |

All models included the following covariates: age, smoking, diabetes, systolic blood pressure, total cholesterol, total triglycerides, body mass index and male/female family history of premature CHD. The MI/IHD model also included Lp(a). The Troponin and BNP values were fitted to the model as thirds.
